# Supplementary material for: Synthesis and characterisation of a {Ni8} single molecule magnet and another octanuclear nickel cage
Source: Royal Society of Chemistry journal article supplement (doi:10.1039/b500581g), 2005-01-01
Supplement: b500581g.pdf [file b500581g.pdf]

## Supplementary Experimental Details

### Synthesis of 1

Hmpo (0.196 g, 2 mmol) and <sup>t</sup>butylbenzoic acid (0.376 g, 2 mmol) were mixed in methanol (50 cm<sup>3</sup>) and added to an aqueous solution of nickel (II) tetrafluoroborate (50% b/w, 0.929g, 2 mmol). The light apple green solution was stirred for 5m. before addition of sodium methoxide solution (4cm<sup>3</sup>, 0.5 mol/dm<sup>3</sup>, 2 mmol) and refluxing for 24h. The solvent was then removed *in vacuo* leaving a lime green solid that was dissolved in ethyl acetate (25 cm<sup>3</sup>), from which crystals of **8** grew over ten days, that were suitable for X-Ray diffraction from a synchrotron source. Yield, 65mg, 7% by % Ni. Elemental analysis: Calculated (found): C 49.63 (48.76); H 5.34 (5.33); N 7.12 (7.07); F 5.23 (6.19), Na 1.59 (1.60); Ni 16.17 (15.81).

### Synthesis of 2

Hmpo (0.196 g, 2 mmol) and <sup>t</sup>butylbenzoic acid (0.376 g, 2 mmol) were mixed in methanol (50 cm<sup>3</sup>) and added to an aqueous solution of nickel (II) tetrafluoroborate (50% b/w, 0.929 g, 2 mmol). The light apple green solution was stirred for 5m. before addition of sodium methoxide solution (4 cm<sup>3</sup>, 0.5 mol/dm<sup>3</sup>, 2 mmol) and excess sodium azide (0.65g, 10mmol), which turned the solution notably darker and further stirring for 72h. The solvent was then removed *in vacuo* at room temperature leaving a green solid that was dissolved in ethyl acetate (25 cm<sup>3</sup>), and filtered to leave an apple green solution. From this solution crystals of **12** grew over a period of one week, that were suitable for X-Ray diffraction from a synchrotron source. Yield, 47 mg, 7% by % Ni, . Microanalysis suggests that some ethyl acetate is lost in powder form, and that only four molecules remain. Elemental analysis for the molecule without these four ethyl acetate molecules C<sub>67</sub>H<sub>101</sub>N<sub>56</sub>Na<sub>2</sub>Ni<sub>8</sub>O<sub>20</sub>: Calculated (found): C 31.85 (31.51); H 4.03 (3.94); N 31.05 (29.99).

### Synthesis of 3

Hmpo (0.196 g, 2 mmol) and benzoic acid (0.376 g, 2 mmol) were mixed in methanol (50 cm<sup>3</sup>) and added to an aqueous solution of nickel (II) tetrafluoroborate (50% b/w, 0.929 g,

# Supplementary Material (ESI) for Chemical Communications  
# This journal is © The Royal Society of Chemistry 2005

2 mmol). The light apple green solution was stirred for 5m. before addition of sodium methoxide solution (4 cm<sup>3</sup>, 0.5 mol/dm<sup>3</sup>, 2 mmol) and excess sodium azide (0.65 g, 10 mmol), which turned the solution notably darker and further stirring for 72h. The solvent was then removed *in vacuo* at room temperature leaving a lime green solid that was dissolved in ethyl acetate (25 cm<sup>3</sup>), and filtered to leave an apple green solution. From this solution crystals of **13** grew over a period of one week, that were suitable for X-Ray diffraction from a synchrotron source. Yield, 83 mg, 13% by % Ni. Microanalysis indicates that the terminal ethyl acetates are lost in powder form and replaced by water molecules. Elemental analysis for replacement with water molecules as C<sub>54</sub>H<sub>82</sub>N<sub>56</sub>Na<sub>2</sub>Ni<sub>8</sub>O<sub>22</sub>: Calculated (found): C 27.22 (26.72); H 3.47 (3.36); N 32.91 (32.98).
